# Supplementary material for: Optimizing the sulfonic groups of a polymer to coat the zinc anode for dendrite suppression
Source: Royal Society of Chemistry journal article supplement (doi:10.1039/d1cc00924a), 2021-01-01
Supplement: d1cc00924a1.pdf [file d1cc00924a1.pdf]

## Optimizing sulfonic group of polymer to coat zinc anode for dendrite suppression

Yan Wang,<sup>a</sup> Yuetao Wang,<sup>a</sup> Chuanxi Chen,<sup>a</sup> Xin Chen,<sup>a</sup> Qinghe Zhao,<sup>a</sup> Luyi Yang,<sup>a</sup> Lu Yao,<sup>a</sup> Runzhi Qin,<sup>\*a</sup> Hong Wu,<sup>\*b</sup> Zhongyi Jiang,<sup>b</sup> and Feng Pan,<sup>\*a</sup>

### Experimental section

#### 1) Material synthesis

The PEEK powder (2 g) was gradually added into 40 mL sulfuric acid under vigorously mechanically stirring in a three-neck flask. After the PEEK powder was dissolved at room temperature, the reaction was carried out at 70 °C in a water bath for a prescribed time. Then the sulfonated polymer was recovered by precipitating the solution into a large excess of ice water under stirring. The polymer was washed repeatedly with deionized water until the pH of the water was 6-7. After washing, the SPEEK polymer was then dried at 80 °C for 24 h.

V<sub>2</sub>O<sub>5</sub> (0.5456 g) and Zn(CH<sub>3</sub>COO)<sub>2</sub> (0.4280 g) were dissolved into 70 mL deionized water, then 5 mL acetone and 2 mL 10% nitric acid were added into the solution. After ultrasonic treatment for 5 min, the solution was poured into a 100 mL Teflon-lined stainless-steel autoclave. The autoclave was then sealed and heated in an oven at 180°C for 24 h. The obtained green powder was filtrated and washed by deionized water and ethanol, followed by drying at 80°C for 12 h.

#### 2) Material Characterization

The PEEK and SPEEK was investigated by Fourier Transform Infrared Spectrometer (FTIR, PerkinElmer Frontier). The Nuclear magnetic resonance (NMR) spectrum was recorded on a Bruker Avance-III 400 MHz spectrometer. The degree of sulfonation (DS) in SPEEK is calculated by the following equation:

$$\frac{DS}{12 - DS} = \frac{A_n}{A}$$

where  $A_n$  is the peak area of the shifted hydrogen nucleus at 7.5 ppm, and  $A$  is the sum of the peak area of all hydrogen nuclei. The Contact angle was measured on a commercial contact angle meter (PT-705B, Dong Guan Precis Test Equipment Co., Ltd., China). The morphology of the SPEEK coating Zn electrodes was characterized by field emission scanning electron microscope (SEM, ZEISS SUPRA<sup>®</sup> 55), combined with energy dispersive X-ray spectroscopy (EDX, Oxford X-Max 20) for the determination of the elemental composition. X-ray diffraction (XRD) patterns of Zn anode was recorded using a Bruker-AXS diffractometer (Bruker D8 Advance) with Cu K<sub>α</sub> radiation ( $\lambda = 1.541 \text{ \AA}$ ).

#### 3) Electrochemical measurements

The Zn/Zn symmetric cells were assembled in coin cells (CR2032-type), with commercial Zn foil electrodes (50  $\mu\text{m}$  in thickness) and a double-layer dust-free paper separator. Cycling performance was carried out at 0.5 mA cm<sup>-2</sup> or 5 mA cm<sup>-2</sup>, with the capacity of 0.5 mAh cm<sup>-2</sup>. Impedance measurements were carried out from 10 kHz to 0.01 Hz with an AC amplitude of 10 mV using an electrochemical workstation (Solartron 1470E). The 3 mol L<sup>-1</sup> ZnSO<sub>4</sub> electrolyte is used as the electrolyte in all the electrochemical measurements.

The full cells were assembled in coin cells (CR2032-type), while the cathode electrodes were made by casting the mixture which contains ZnVO powder (70%wt), Super P carbon (20%wt), and polyvinylidene fluoride (10 wt%), onto titanium foil (10 mm in thickness).

The rate and cycling performance of cells were tested by the Neware battery test system (BTS-5V5mA)

#### 4) Ab initio calculations

All calculations were performed using the plane-wave projector-augmented wave method with an energy cut-off of 520 eV, as implemented in the Vienna ab initio simulation package (VASP). The Perdew-Burke-Ernzerhof (PBE) form of generalized gradient approximation (GGA) was chosen as the exchange-correlation potential. The structures were relaxed until the forces were less than 0.03 eV/Å, and the energy convergent standard was  $10^{-5}$  eV. The Monkhorst-Pack mesh of unit cells was set to  $1 \times 1 \times 1$ .

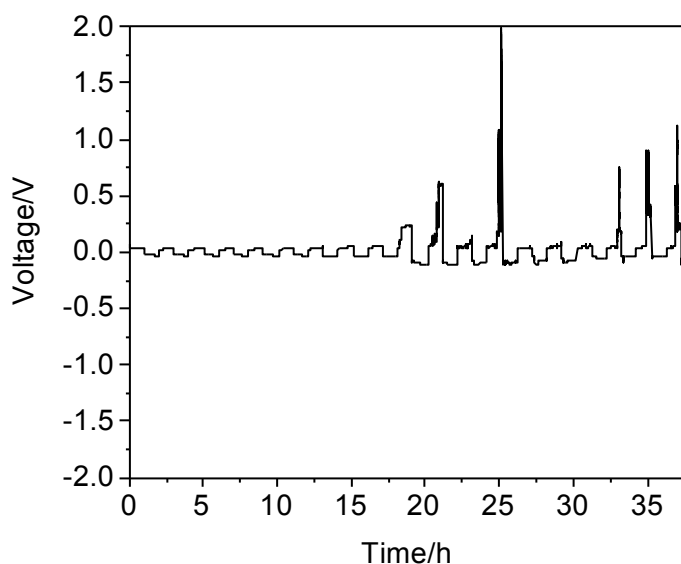

Figure S1 Cycling performance of Zn@PEEK electrode

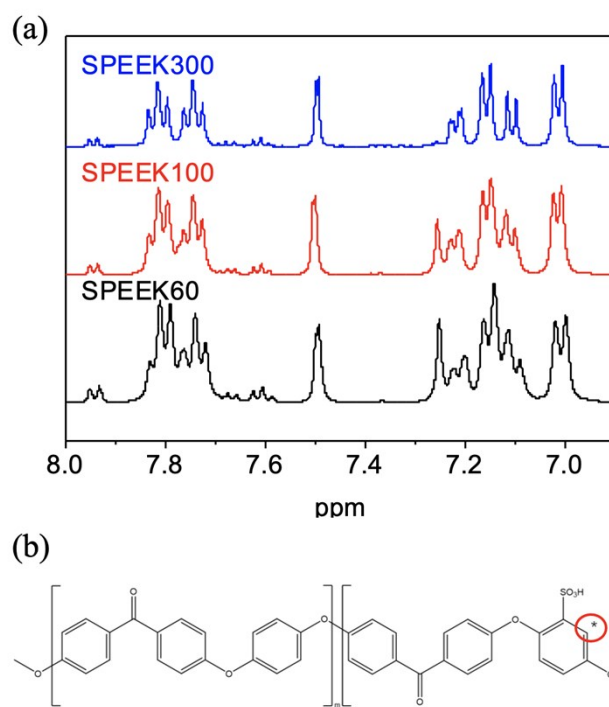

Figure S2 NMR profile of SPEEK material

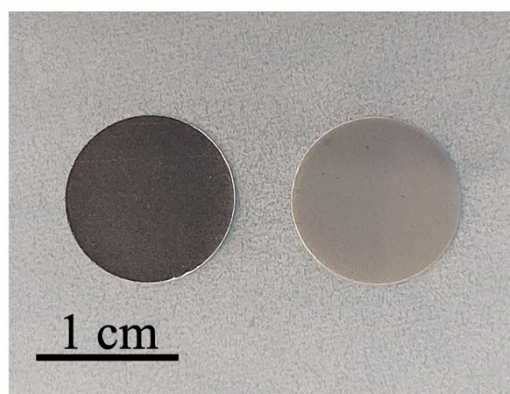

Figure S3 Optical image of bare zinc and Zn@SPEEK100

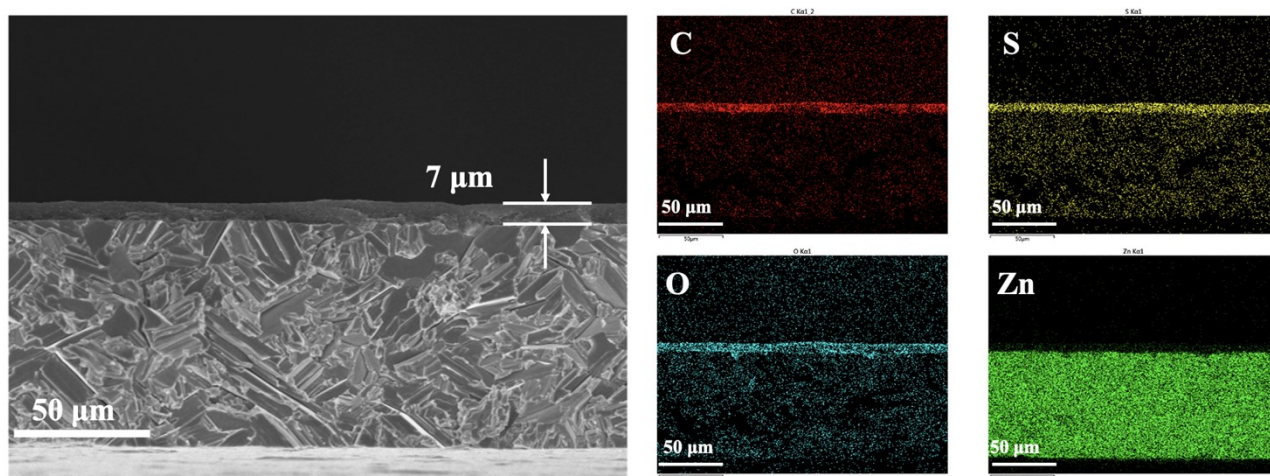

Figure S4 Cross-section of Zn@SPEEK100

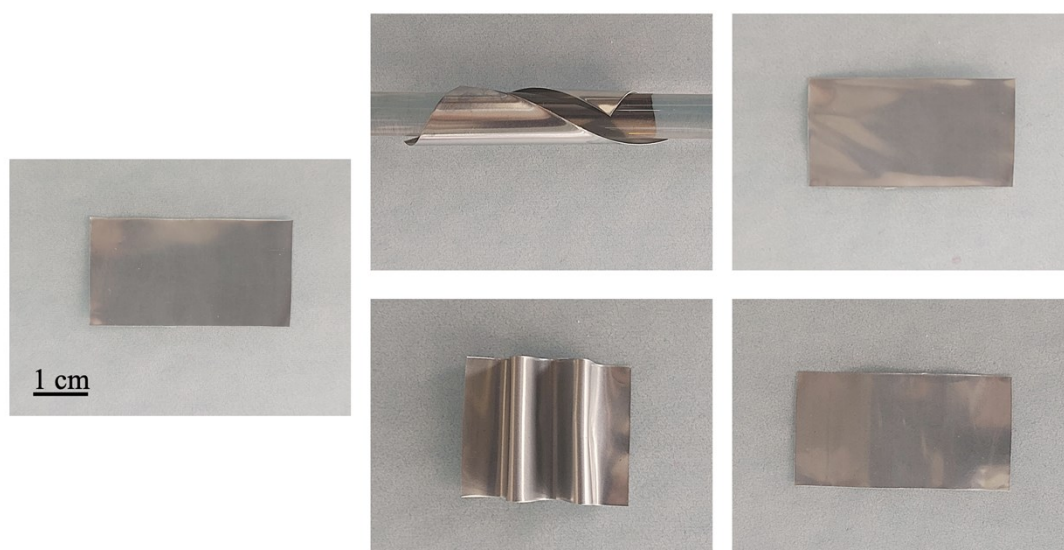

Figure S5 Bending and twisting of Zn@SPEEK100

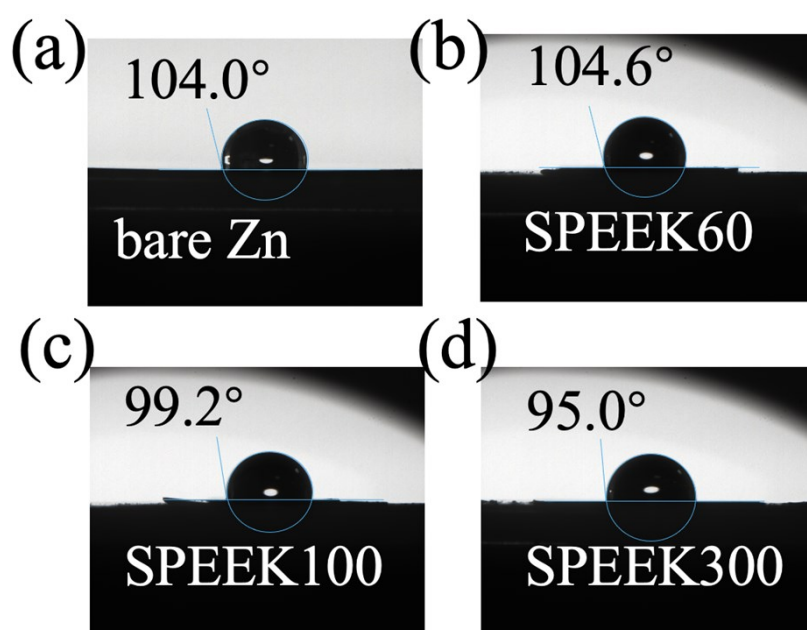

Figure S6 Contact angle of (a) bare zinc, (b) Zn@SPEEK60, (c) Zn@SPEEK100, and (d) Zn@SPEEK300

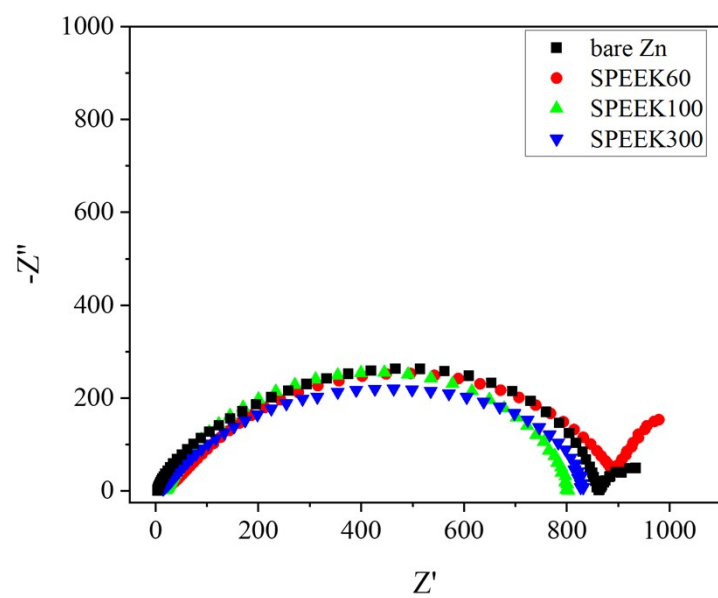

Figure S7 EIS results of bare zinc and SPEEK coated zinc

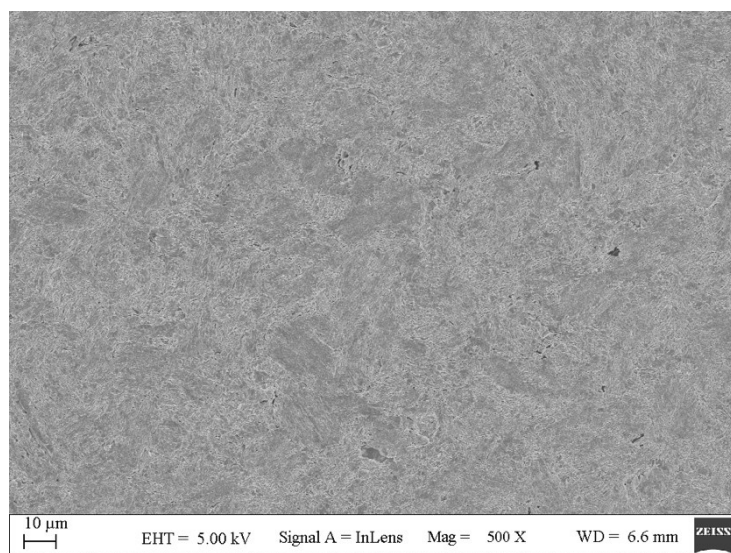

Figure S8 SEM images of Zn@SPEEK60 after 10 cycles

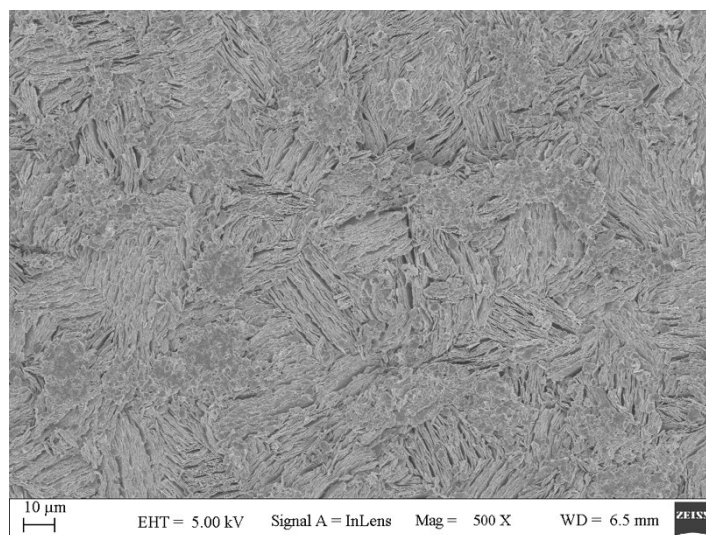

Figure S9 SEM images of Zn@SPEEK100 after 100 cycles

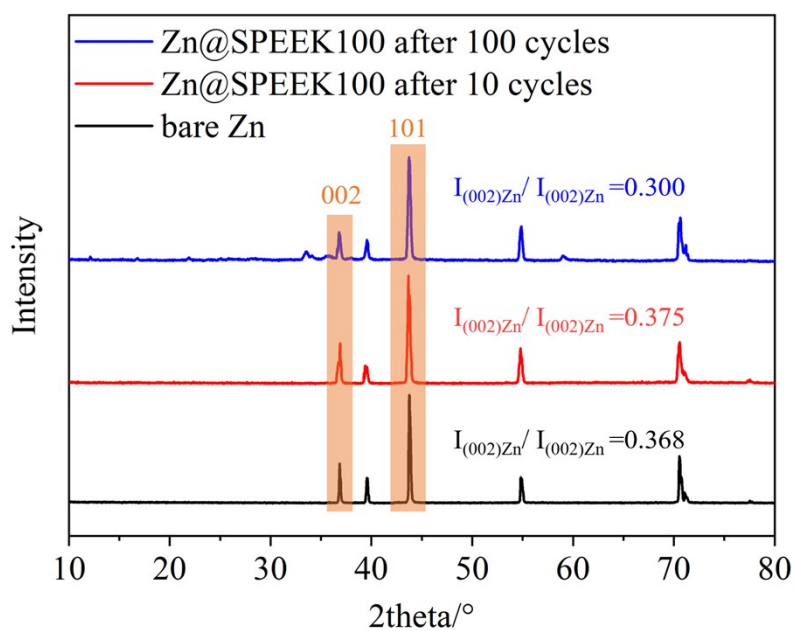

Figure S10 XRD profiles of pristine zinc and Zn@SPEEK100 after cycles

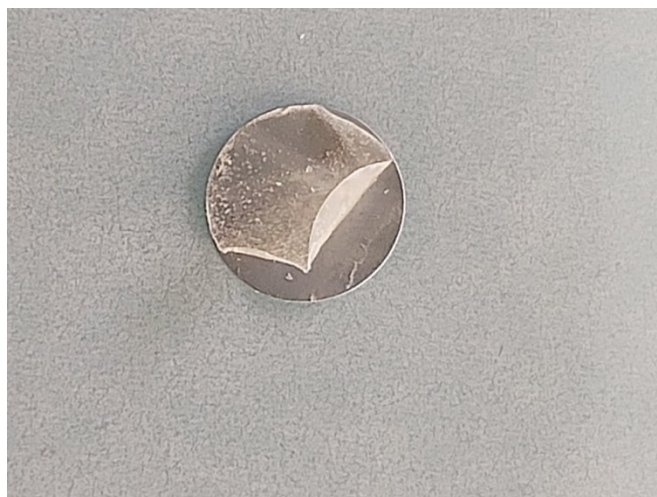

Figure S11 Swelling and peeling off of SPEEK300 membrane

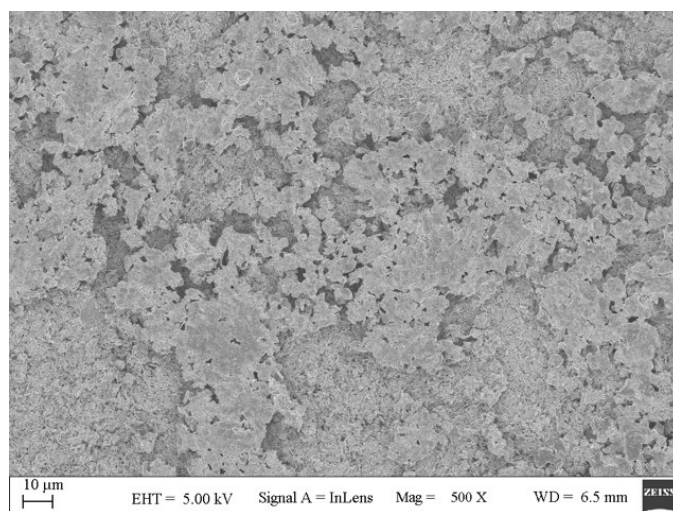

Figure S12 SEM images of Zn@SPEEK300 after 10 cycles

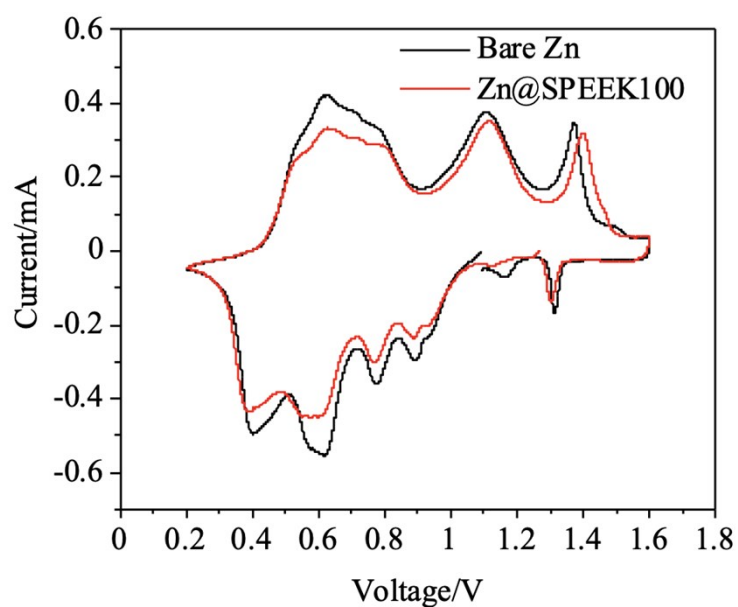

Figure S13 CV profiles of bare zinc and Zn@SPEEK100 in full cell

Table S1 Comparison of the Zn/Zn cycling performance with organic coatings

| Number | Cycling lifetime<br>/h | Current density<br>/mA cm <sup>-2</sup> | Capacity<br>/mAh cm <sup>-2</sup> | Coating material | Reference |
|--------|------------------------|-----------------------------------------|-----------------------------------|------------------|-----------|
| 1      | 1600                   | 0.5                                     | 25                                | SPEEK            | this work |
| 2      | 2200                   | 0.5                                     | 0.5                               | PVB              | [1]       |
| 3      | 8000                   | 0.5                                     | 0.25                              | PA               | [2]       |
| 4      | 1145                   | 1                                       | 1                                 | PAN              | [3]       |
| 5      | 2000                   | 0.25                                    | 0.05                              | β-PVDF           | [4]       |
| 6      | 800                    | 0.5                                     | 0.25                              | Cyanoacrylate    | [5]       |
| 7      | 900                    | 0.2                                     | 0.2                               | KGM              | [6]       |
| 8      | 2220                   | 0.2                                     | 0.1                               | PAM/PVP          | [7]       |
| 9      | 1000                   | 1                                       | 0.5                               | Nafion           | [8]       |
